# Supplementary material for: The Dark Side of Orchid Symbiosis: Can Tulasnella calospora Decompose Host Tissues?
Source: PubMed Central journal article supplement (PMC7247694; doi:10.3390/ijms21093139), 2020-04-29
Supplement: ijms-21-03139-s001.pdf [file ijms-21-03139-s001.pdf]

## Supplementary Materials:

# The Dark Side of Orchid Symbiosis: Can *Tulasnella calospora* Decompose Host Tissues?

Martino Adamo <sup>1</sup>, Matteo Chialva <sup>1</sup>, Jacopo Calevo <sup>1,†,\*</sup>, Silvia De Rose <sup>1</sup>, Mariangela Girlanda <sup>1</sup>, Silvia Perotto <sup>1,†</sup> and Raffaella Balestrini <sup>2,†,\*</sup>

<sup>1</sup> Department of Life Sciences and Systems Biology, University of Turin, Viale Mattioli 25, 10125 Turin, Italy; martino.adamo@unito.it (M.A.), matteo.chialva@unito.it (M.C.), silvia.derose@edu.unito.it (S.D.R.), mariangela.girlanda@unito.it (M.G.), silvia.perotto@unito.it (S.P.)

<sup>2</sup> National Research Council, Institute for Sustainable Plant Protection, Viale Mattioli 25, 10125 Turin, Italy

\* Correspondence: raffaella.balestrini@ipsp.cnr.it (R.B.); jacopo.calevo@gmail.com (J.C.); Tel.: +390116502927 (R.B.)

† These authors contributed equally to this work.

‡ Present address: Department of Biology, University of Naples Federico II, campus Monte Sant'Angelo building 7, Via Cinthia, 80126 Naples, Italy

## Supplementary Figures

**Figure S1.** *Cattleya purpurata* seedlings colonized by *Tulasnella calospora*.

**Figure S2.** Expression pattern of *TcGH45* in *C. purpurata* model system and under free-living conditions.

**Figure S3.** Symbiosis marker genes in *S. vomeracea*.

**Figure S4.** *T. calospora* gene expression clustering in *C. purpurata*, *S. vomeracea* and free-living condition.

## Supplementary Tables

**Table S1.** Species and experimental conditions of RNA-seq studies considered for gene expression meta-analysis.

**Table S2.** Reads number and mapping details of selected RNA-seq libraries from short read archive (SRA).

**Table S3.** Reference JGI fungal transcriptomes used for mapping.

**Table S4.** Selected primers used in RT-qPCR experiments.

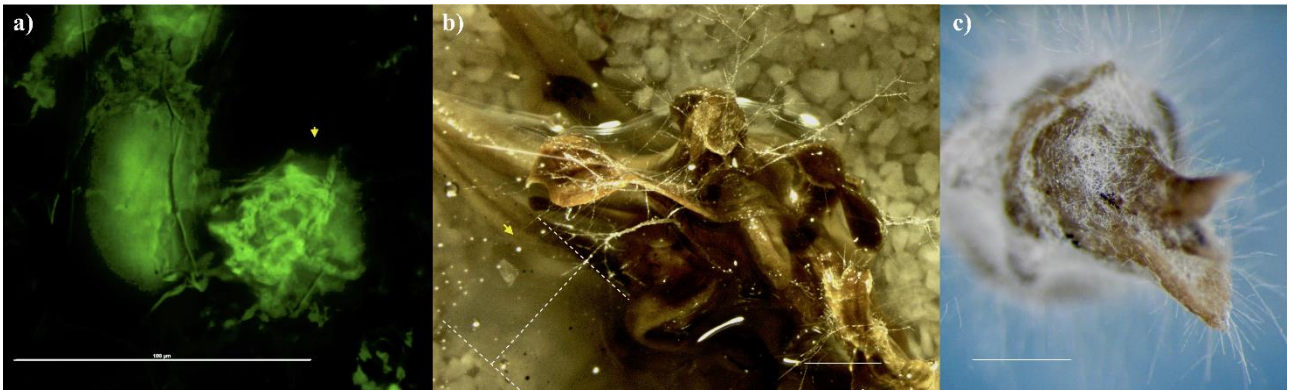

**Figure S1.** *Cattleya purpurata* seedlings colonized by *Tulasnella calospora*. **a)** Detail of a peloton (yellow arrow) inside the orchid root cells. Scale bar = 100  $\mu$ m; **b)** dead orchid tissues covered by fungal hyphae. Fungal inoculum is indicated by a yellow arrow. Scale bar = 2 mm; **c)** young dead seedling where the saprotrophic behavior of the fungus seems to prevail. Scale bar = 3 mm.

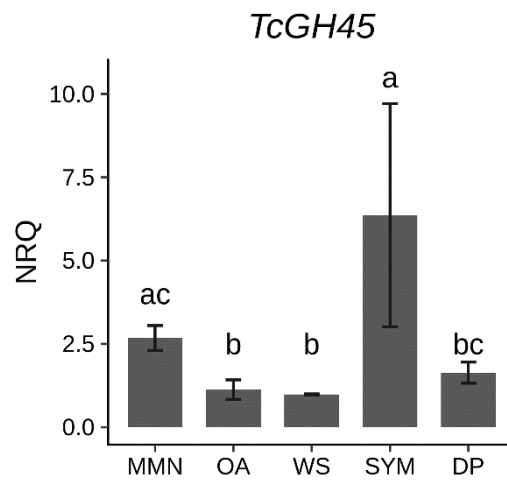

**Figure S2.** Expression pattern of *TcGH45* in *C. purpurata* model system and under free-living conditions. Letters indicate significant differences after Kruskal-Wallis test and Dunn's post-hoc test ( $p < 0.05$ ). NRQ, normalized relative quantities; mean  $\pm$  standard error (SE) is plotted.

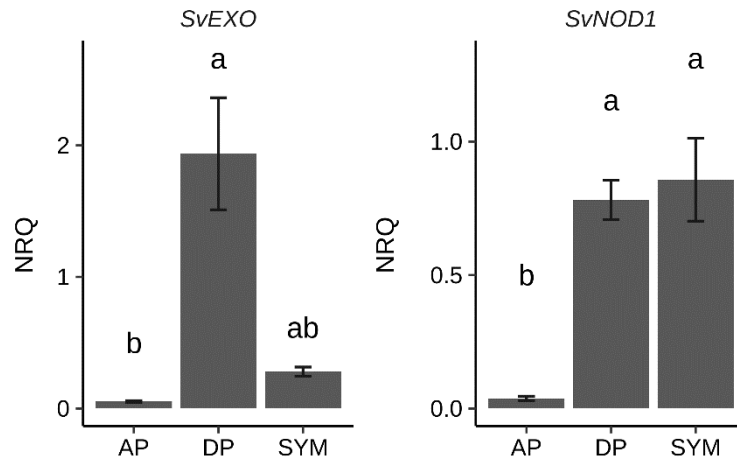

**Figure S3.** Symbiosis marker genes in *S. vomeracea*. Letters indicate significant differences after Kruskal-Wallis test and Dunn's post-hoc test ( $p < 0.05$ ). NRQ, normalized relative quantities; mean  $\pm$  standard error (SE) is plotted.

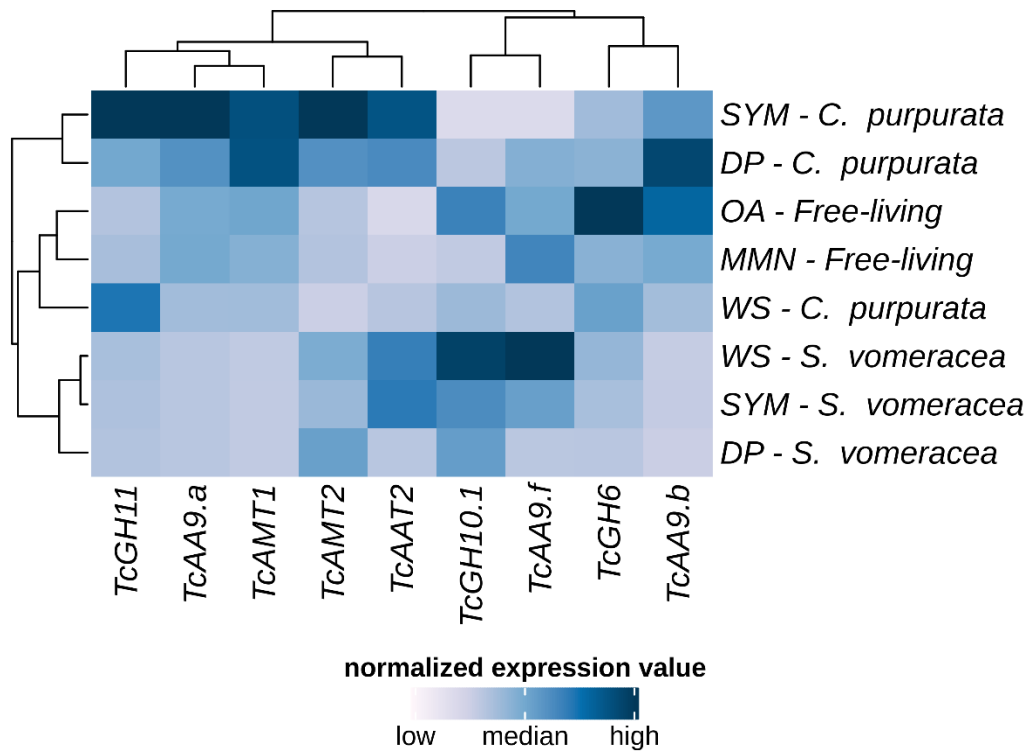

**Figure S4.** *T. calospora* gene expression clustering in *C. purpurata*, *S. vomeracea* and free-living condition. Heatmaps show z-score scaled NRQ values by gene from RT-qPCR experiments. Hierarchical clustering dendrograms show Pearson correlation of expression values across conditions and genes.

**Table S1.** Species and experimental conditions of RNA-seq studies considered for gene expression meta-analysis. Fungal species with different ecology were considered: orchid mycorrhizal (OM), ecto-mycorrhizal (ECM), white rot (WR), pathogens.

| Species                                | Strain     | Ecology  | Conditions                      | Plant Host                  | Instrument and Layout        | SRA Study | References            |
|----------------------------------------|------------|----------|---------------------------------|-----------------------------|------------------------------|-----------|-----------------------|
| <i>Tulasnella calospora</i>            | AL13       | OM       | free-living mycelium, protocorm | <i>Serapias vomeracea</i>   | HiSeq2000, PE                | SRP050561 | Kohler et al. (2015)  |
| <i>Serendipita vermifera</i>           | MAFF 30583 | OM       | free-living mycelium, roots     | <i>Arabidopsis thaliana</i> | HiSeq2000, PE                | SRP050866 | Kohler et al. (2015)5 |
| <i>Hebeloma cylindrosporum</i>         | TV98 IV3   | ECM      | free-living mycelium, roots     | <i>Pinus pinaster</i>       | HiSeq2000, SE                | SRP050559 | Kohler et al. (2015)  |
| <i>Piloderma croceum</i>               | F 1598     | ECM      | free-living mycelium, roots     | <i>Quercus robur</i>        | HiSeq2000, PE                | SRP050868 | Kohler et al. (2015)  |
| <i>Phanerochaete chrysosporium</i>     | RP78       | WR       | vegetative mycelium             | -                           | HiSeq2500, PE                | SRP179770 | Krizsán et al. (2019) |
| <i>Schizophyllum commune</i>           | H4-8       | WR       | vegetative mycelium             | -                           | HiSeq2500, PE                | SRP179769 | Krizsán et al. (2019) |
| <i>Puccinia graminis f.sp. tritici</i> | 99KS76A-1  | Pathogen | infected leaf (4 dpi*)          | <i>Triticum aestivum</i>    | Illumina Genome Analyzer, PE | SRP121504 | Salcedo et al. (2017) |
| <i>Ustilago maydis</i>                 | FB1 x FB2  | Pathogen | infected leaf (4 dpi*)          | <i>Zea mays</i>             | HiSeq2000, PE                | SRP117697 | Lanver et al. (2018)  |

\* days post infection.

**Table S2.** Reads number and mapping details of selected RNA-seq libraries from short read archive (SRA).

| SRA Run    | Species                      | Average Read Length | Condition             | Raw        | Filtered   | Mapped     | Mapped (%) |
|------------|------------------------------|---------------------|-----------------------|------------|------------|------------|------------|
| SRR1693601 | <i>Tulasnella calospora</i>  | 200                 | Free-living mycelium  | 16,495,698 | 14,788,396 | 7,537,645  | 50.97      |
| SRR1693602 | <i>Tulasnella calospora</i>  | 200                 | Free-living mycelium  | 29,808,337 | 26,571,893 | 19,400,139 | 73.01      |
| SRR1693603 | <i>Tulasnella calospora</i>  | 200                 | Free-living mycelium  | 23,835,798 | 21,445,992 | 16,663,536 | 77.7       |
| SRR1693604 | <i>Tulasnella calospora</i>  | 200                 | Mycorrhizal protocorm | 24,757,364 | 22,887,687 | 2,085,068  | 9.11       |
| SRR1693605 | <i>Tulasnella calospora</i>  | 200                 | Mycorrhizal protocorm | 26,783,635 | 24,835,443 | 2,200,420  | 8.86       |
| SRR1693606 | <i>Tulasnella calospora</i>  | 200                 | Mycorrhizal protocorm | 28,131,331 | 26,299,612 | 2,422,194  | 9.21       |
| SRR1695524 | <i>Serendipita vermifera</i> | 202                 | Free-living mycelium  | 40,981,314 | 34,350,150 | 26,645,411 | 77.57      |
| SRR1695525 | <i>Serendipita vermifera</i> | 202                 | Free-living mycelium  | 42,985,842 | 35,737,581 | 28,297,017 | 79.18      |
| SRR1695526 | <i>Serendipita vermifera</i> | 202                 | Free-living mycelium  | 15,118,764 | 12,620,290 | 10,050,799 | 79.64      |

|            |                                    |     |                        |             |             |            |       |
|------------|------------------------------------|-----|------------------------|-------------|-------------|------------|-------|
| SRR1695527 | <i>Serendipita vermifera</i>       | 202 | Mycorrhizal roots      | 6,047,711   | 4,973,626   | 72,118     | 1.45  |
| SRR1695528 | <i>Serendipita vermifera</i>       | 202 | Mycorrhizal roots      | 7,767,250   | 6,429,432   | 76,510     | 1.19  |
| SRR1695529 | <i>Serendipita vermifera</i>       | 202 | Mycorrhizal roots      | 6,304,164   | 5,200,967   | 46,809     | 0.9   |
| SRR1693517 | <i>Hebeloma cylindrosporum</i>     | 150 | Free-living mycelium   | 36,570,502  | 36,097,183  | 26,751,622 | 74.11 |
| SRR1693518 | <i>Hebeloma cylindrosporum</i>     | 150 | Free-living mycelium   | 35,884,216  | 35,583,533  | 24,826,631 | 69.77 |
| SRR1693519 | <i>Hebeloma cylindrosporum</i>     | 150 | Free-living mycelium   | 33,590,534  | 33,229,737  | 23,024,885 | 69.29 |
| SRR1693520 | <i>Hebeloma cylindrosporum</i>     | 150 | Ectomycorrhiza         | 104,061,378 | 101,762,901 | 36,807,641 | 36.17 |
| SRR1693521 | <i>Hebeloma cylindrosporum</i>     | 150 | Ectomycorrhiza         | 90,962,146  | 89,468,417  | 27,529,432 | 30.77 |
| SRR1693522 | <i>Hebeloma cylindrosporum</i>     | 150 | Ectomycorrhiza         | 99,771,880  | 98,001,116  | 32,085,565 | 32.74 |
| SRR1695538 | <i>Piloderma croceum</i>           | 202 | Free-living mycelium   | 59,973,882  | 55,067,234  | 45,815,939 | 83.2  |
| SRR1695539 | <i>Piloderma croceum</i>           | 202 | Free-living mycelium   | 16,176,073  | 12,951,125  | 10,821,960 | 83.56 |
| SRR1695540 | <i>Piloderma croceum</i>           | 202 | Free-living mycelium   | 24,212,031  | 19,310,902  | 16,157,432 | 83.67 |
| SRR1695541 | <i>Piloderma croceum</i>           | 202 | Ectomycorrhiza         | 22,510,865  | 19,224,485  | 2,868,293  | 14.92 |
| SRR1695542 | <i>Piloderma croceum</i>           | 202 | Ectomycorrhiza         | 21,303,775  | 18,468,413  | 2,478,461  | 13.42 |
| SRR1695543 | <i>Piloderma croceum</i>           | 202 | Ectomycorrhiza         | 21,366,078  | 18,418,760  | 2,562,050  | 13.91 |
| SRR8448307 | <i>Phanerochaete chrysosporium</i> | 249 | vegetative mycelium    | 23,244,895  | 23,141,396  | 17,064,465 | 73.74 |
| SRR8448308 | <i>Phanerochaete chrysosporium</i> | 249 | vegetative mycelium    | 48,638,574  | 48,414,251  | 36,020,203 | 74.4  |
| SRR8448309 | <i>Phanerochaete chrysosporium</i> | 249 | vegetative mycelium    | 27,240,214  | 27,127,794  | 20,299,728 | 74.83 |
| SRR8448292 | <i>Schizophyllum commune</i>       | 249 | vegetative mycelium    | 23,834,135  | 23,668,839  | 18,594,240 | 78.56 |
| SRR8448293 | <i>Schizophyllum commune</i>       | 249 | vegetative mycelium    | 26,519,052  | 26,318,179  | 20,915,057 | 79.47 |
| SRR8448294 | <i>Schizophyllum commune</i>       | 249 | vegetative mycelium    | 25,878,484  | 25,711,912  | 20,096,430 | 78.16 |
| SRR6218744 | <i>Puccinia graminis</i>           | 202 | infected leaf (4 dpi)  | 39,258,693  | 35,329,192  | 936,224    | 2.65  |
| SRR6218745 | <i>Puccinia graminis</i>           | 202 | infected leaf (4 dpi)  | 50,449,094  | 42,319,457  | 922,564    | 2.18  |
| SRR6218772 | <i>Puccinia graminis</i>           | 202 | infected leaf (4 dpi)  | 25,880,263  | 23,943,494  | 474,081    | 1.98  |
| SRR6039731 | <i>Ustilago maydis</i>             | 202 | infected plant (4 dpi) | 30,838,063  | 29,406,524  | 349,938    | 1.19  |
| SRR6039732 | <i>Ustilago maydis</i>             | 202 | infected plant (4 dpi) | 38,837,342  | 37,108,931  | 890,614    | 2.4   |
| SRR6039733 | <i>Ustilago maydis</i>             | 202 | infected plant (4 dpi) | 35,511,412  | 32,985,380  | 1,576,701  | 4.78  |

**Table S3.** Reference JGI fungal transcriptomes used for mapping.

| <b>Species</b>                         | <b>Version</b>             | <b>Reference</b>                                |
|----------------------------------------|----------------------------|-------------------------------------------------|
| <i>Tulasnella calospora</i>            | Tulca1 AL13/4D v1.0        | Kohler et al. (2015)                            |
| <i>Serendipita vermifera</i>           | Sebve1 MAFF 305830 v1.0    | Kohler et al. (2015)                            |
| <i>Hebeloma cylindrosporum</i>         | Hebcy2 h7 v2.0             | Kohler et al. (2015)                            |
| <i>Piloderma croceum</i>               | Pilcr1 F 1598 v1.0         | Kohler et al. (2015)                            |
| <i>Phanerochaete chrysosporium</i>     | Phcr2 RP-78 v2.2           | Ohm et al. (2014)                               |
| <i>Schizophyllum commune</i>           | Schco3 H4-8 v3.0           | Ohm et al. (2010)                               |
| <i>Puccinia graminis f.sp. tritici</i> | Pucgr2 f. sp. tritici v2.0 | Duplessis et al. (2011);<br>Cuomo et al. (2017) |
| <i>Ustilago maydis</i>                 | Ustma2 521 v2.0            | Kamper et al. (2006)                            |

**Table S4.** Selected primers used in RT-qPCR experiments. Gene description corresponds to the main activity of the gene. In the reference column, the original studies for primers sequences are reported. Reference genes primer names are reported in bold.

| <b>Primer Name</b>        | <b>Target Species</b>       | <b>Description</b>                                               | <b>Sequence (5'–3')</b>                              | <b>Transcript ID<sup>†</sup></b> | <b>Reference</b>     |
|---------------------------|-----------------------------|------------------------------------------------------------------|------------------------------------------------------|----------------------------------|----------------------|
| <i>TcGH6.03</i>           | <i>Tulasnella calospora</i> | CAZyme - cellobiohydrolase                                       | F - GCCACCCAGAGCAGTTCTAC<br>R - GCAAGGTAATCGCCGAGAGT | 69053                            | This study           |
| <i>TcGH10a</i>            | <i>Tulasnella calospora</i> | CAZyme - endo-1,4- $\beta$ -xylanase/endo-1,3- $\beta$ -xylanase | F - CGGAGCCTTCGCAGAACTCG<br>R - GCTCGCGCTCGTGATAGACG | 14789                            | This study           |
| <i>TcGH11*</i>            | <i>Tulasnella calospora</i> | CAZyme - endo-1,4- $\beta$ -xylanase/endo-1,3- $\beta$ -xylanase | F - CGCTACTGCTGCCGTCTTGG<br>R - GCCGTCCGTCCAGAAGGAGT | 80414                            | This study           |
| <i>TcGH11new</i>          | <i>Tulasnella calospora</i> | CAZyme - endo-1,4- $\beta$ -xylanase/endo-1,3- $\beta$ -xylanase | F - CTACAAGGCCATCCGAACCA<br>R - GTTCCGCCAGTACGATGACT | 80414                            | This study           |
| <i>TcGH45*</i>            | <i>Tulasnella calospora</i> | CAZyme - endoglucanase                                           | F - CAGCAACCTTCCTGCGGCTC<br>R - AGAAGCGGGGCAAGTGACCT | 224031                           | This study           |
| <i>TcAA9a</i>             | <i>Tulasnella calospora</i> | CAZyme - Lytic Polysaccharide Monooxygenase (LPMO)               | F - CGTTAGCATCTTCTGGGGCA<br>R - CGATCTTGGTCGGGTCAGTC | 75481                            | This study           |
| <i>TcAA9b</i>             | <i>Tulasnella calospora</i> | CAZyme - Lytic Polysaccharide Monooxygenases (LPMO)              | F - ATCAGGCGAACCTTCTGTCC<br>R - ACTTGGCGTCGAGAGAGTTG | 6298                             | This study           |
| <i>TcAA9c<sup>§</sup></i> | <i>Tulasnella calospora</i> | CAZyme - Lytic Polysaccharide Monooxygenases (LPMO)              | F - CGGTCTGGTTCAAAGTTGCC<br>R - CGTGCAGAGCAATGTGTTCG | 115568                           | This study           |
| <i>TcAA9d<sup>§</sup></i> | <i>Tulasnella calospora</i> | CAZyme - Lytic Polysaccharide Monooxygenases (LPMO)              | F - CTCTGATCGTCAACGGCACT<br>R - AAGAAACGACTGTGACGGGG | 27439                            | This study           |
| <i>TcAA9e<sup>§</sup></i> | <i>Tulasnella calospora</i> | CAZyme - Lytic Polysaccharide Monooxygenases (LPMO)              | F - CAAGCCAACAATCCGCAACT<br>R - CTGATTGACTGGGGGTTGGG | 641723                           | This study           |
| <i>TcAA9f</i>             | <i>Tulasnella calospora</i> | CAZyme - Lytic Polysaccharide Monooxygenases (LPMO)              | F - GGAGACTGAAGGGATTGGGC<br>R - CGTCAGCCATGTTGCGTATG | 4643                             | This study           |
| <i>TcAMT1</i>             | <i>Tulasnella calospora</i> | Ammonium transporter                                             | F - AGGACCAACTACCGCCACCA<br>R - CATCCGTAAGGAGCGCCATC | 241330                           | Fochi et al. (2017a) |
| <i>TcAMT2</i>             | <i>Tulasnella calospora</i> | Ammonium transporter                                             | F - ATTCGCGAGCTGCTTCCATC<br>R - GCAAGGTGGGGCTGAACATC | 183841                           | Fochi et al. (2017a) |

|               |                             |                                           |                                                               |                  |                       |
|---------------|-----------------------------|-------------------------------------------|---------------------------------------------------------------|------------------|-----------------------|
| <i>TcAAT2</i> | <i>Tulasnella calospora</i> | Aminoacid transporter                     | F - AAAGGCGGTATTGCGCTTCA<br>R - GGCAGAGAAAGCACCGAGGA          | 81605            | Fochi et al. (2017a)  |
| <i>TcEF1α</i> | <i>Tulasnella calospora</i> | Elongation factor (fungal reference gene) | F - CAAGCCTATGTGCGTTGAGA<br>R - ACGAGAATGCGAAGGAAGAA          | 241957           | Perotto et al. (2014) |
| <i>SvNod1</i> | <i>Serapias vomeracea</i>   | Early nodulin 55-2, putative              | F - TGACGGCATCCGCCGAGTTCT<br>R - ACTTGGAATCTCATACGCTCCGCC     | DN89686_c0_g1_i1 | Perotto et al. (2014) |
| <i>SvEXO</i>  | <i>Serapias vomeracea</i>   | Exocyst subunit exo70 family protein H2   | F - CTGCTTCGCCGATGTTACCC<br>R - TCGGAGAGGGCTTGGTGAAG          | DN73752_c2_g2_i1 | Fochi et al. (2017b)  |
| <i>SvUBI</i>  | <i>Serapias vomeracea</i>   | Ubiquitin                                 | F - TCTATCTATTCTTGCGGGGG<br>R - CACATGGCGCAGTCAATAAA          | DN70641_c1_g2_i1 | Perotto et al. (2014) |
| <i>SvEF1α</i> | <i>Serapias vomeracea</i>   | Elongation factor (plant reference gene)  | F - CGATCTCGTAGTGATCTGAGCAAG<br>R - GAGACAGAAATAACAACCAGCAACA | DN66666_c0_g1_i1 | Fochi et al. (2017a)  |

**Notes:** \* oligonucleotides that worked only in the *Cattleya-Tulasnella* model. § oligonucleotides tested, but not included in results due to low or no amplification. † *T. calospora* transcripts IDs refers to the AL13/D transcriptome deposited in JGI portal (Kohler et al. 2015) while *S. vomeracea* IDs refers to the assembled transcriptome (Fochi et al. 2017a) available at NCBI (accession GSE87120). ‡ MYC reads and FLM reads refer to the *T. calospora* RNA-seq transcriptome analysis (Kohler et al. 2015; Fochi et al. 2017a). MYC reads and FLM reads columns show the mean number of reads observed in symbiotic *T. calospora* and free-living *T. calospora* respectively.



## References

- Cuomo CA, Bakkeren G, Khalil HB, et al (2017) Comparative Analysis Highlights Variable Genome Content of Wheat Rusts and Divergence of the Mating Loci. *G3 (Bethesda)* 7:361–376. <https://doi.org/10.1534/g3.116.032797>
- Duplessis S, Cuomo CA, Lin Y-C, et al (2011) Obligate biotrophy features unraveled by the genomic analysis of rust fungi. *Proc Natl Acad Sci USA* 108:9166–9171. <https://doi.org/10.1073/pnas.1019315108>
- Fochi V, Chitarra W, Kohler A, et al (2017a) Fungal and plant gene expression in the *Tulasnella calospora*–*Serapias vomeracea* symbiosis provides clues about nitrogen pathways in orchid mycorrhizas. *New Phytologist* 213:365–379. <https://doi.org/10.1111/nph.14279>
- Fochi V, Falla N, Girlanda M, et al (2017b) Cell-specific expression of plant nutrient transporter genes in orchid mycorrhizae. *Plant Science* 263:39–45. <https://doi.org/10.1016/j.plantsci.2017.06.015>
- Kämper J, Kahmann R, Bölker M, et al (2006) Insights from the genome of the biotrophic fungal plant pathogen *Ustilago maydis*. *Nature* 444:97–101. <https://doi.org/10.1038/nature05248>
- Kohler A, Kuo A, Nagy LG, et al (2015) Convergent losses of decay mechanisms and rapid turnover of symbiosis genes in mycorrhizal mutualists. *Nature Genetics* 47:410–415. <https://doi.org/10.1038/ng.3223>
- Krizsán K, Almási É, Merényi Z, et al (2019) Transcriptomic atlas of mushroom development reveals conserved genes behind complex multicellularity in fungi. *PNAS* 116:7409–7418. <https://doi.org/10.1073/pnas.1817822116>
- Lanver D, Müller AN, Happel P, et al (2018) The Biotrophic Development of *Ustilago maydis* Studied by RNA-Seq Analysis. *The Plant Cell* 30:300–323. <https://doi.org/10.1105/tpc.17.00764>
- Ohm RA, de Jong JF, Lugones LG, et al (2010) Genome sequence of the model mushroom *Schizophyllum commune*. *Nat Biotechnol* 28:957–963. <https://doi.org/10.1038/nbt.1643>
- Ohm RA, Riley R, Salamov A, et al (2014) Genomics of wood-degrading fungi. *Fungal Genet Biol* 72:82–90. <https://doi.org/10.1016/j.fgb.2014.05.001>
- Perotto S, Rodda M, Benetti A, et al (2014) Gene expression in mycorrhizal orchid protocorms suggests a friendly plant–fungus relationship. *Planta* 239:1337–1349. <https://doi.org/10.1007/s00425-014-2062-x>
- Salcedo A, Rutter W, Wang S, et al (2017) Variation in the AvrSr35 gene determines Sr35 resistance against wheat stem rust race Ug99. *Science* 358:1604–1606. <https://doi.org/10.1126/science.aao7294>
